# Supplementary material for: Internal valence modulates the speed of object recognition
Source: PubMed Central journal article supplement (PMC5428282; doi:10.1038/s41598-017-00385-4), 2017-03-23
Supplement: 41598_2017_385_MOESM1_ESM.pdf [file 41598_2017_385_MOESM1_ESM.pdf]

## **Supplementary Information**

### **Internal valence modulates the speed of object recognition**

Matthew F. Panichello<sup>1\*</sup>, Kestutis Kveraga<sup>2</sup>, Maximilien Chaumon<sup>3</sup>, Moshe Bar<sup>2,4</sup>, and Lisa Feldman Barrett<sup>2,5\*</sup>

1. Princeton Neuroscience Institute, Princeton, NJ, USA
2. Athinoula A. Martinos Center for Biomedical Imaging, Massachusetts General Hospital & Harvard Medical School, Charlestown, MA, USA
3. Berlin School of Mind and Brain, Humboldt-Universität zu Berlin, Berlin, Germany
4. Gonda Multidisciplinary Brain Research Center, Bar-Ilan University, Ramat-Gan, Israel
5. Interdisciplinary Affective Science Laboratory, Department of Psychology, Northeastern University, Boston, MA 02115, USA

| Region          | Vertices in each region of interest |       |          |       |        |       |      |       |      |       |      |       |      |       |
|-----------------|-------------------------------------|-------|----------|-------|--------|-------|------|-------|------|-------|------|-------|------|-------|
|                 | ERC                                 |       | Fusiform |       | Insula |       | IPL  |       | LOC  |       | V1   |       | OFC  |       |
|                 | left                                | right | left     | right | left   | right | left | right | left | right | left | right | left | right |
| Negative1       | 402                                 | 714   | 1667     | 3145  | 1336   | 3068  | 921  | 782   | 2812 | 978   | 1228 | 1309  | 393  | 638   |
| Negative2       | 581                                 | 582   | 2095     | 1194  | 684    | 1541  | 2295 | 3058  | 2218 | 3393  | 2827 | 1531  | 760  | 1404  |
| Negative3       | 1303                                | 580   | 1686     | 1326  | 1050   | 2787  | 1679 | 1281  | 1675 | 1474  | 1652 | 1276  | 1164 | 792   |
| Negative4       | 816                                 | 572   | 1062     | 2036  | 1123   | 1214  | 779  | 765   | 2377 | 1340  | 1301 | 815   | 724  | 750   |
| Negative5       | 774                                 | 794   | 923      | 412   | 1096   | 2923  | 1865 | 2065  | 1911 | 2856  | 1448 | 1765  | 355  | 709   |
| Negative6       | 663                                 | 899   | 1012     | 1514  | 1079   | 3405  | 696  | 1463  | 1053 | 1870  | 1755 | 2602  | 681  | 1094  |
| Negative7       | 562                                 | 747   | 583      | 662   | 1053   | 2664  | 586  | 4110  | 1025 | 1368  | 2112 | 1698  | 303  | 981   |
| Negative8       | 760                                 | 592   | 746      | 1032  | 1627   | 2018  | 1923 | 2251  | 2377 | 1729  | 1579 | 1722  | 779  | 925   |
| Negative9       | 1079                                | 671   | 826      | 2502  | 1738   | 892   | 1236 | 910   | 1964 | 2317  | 3003 | 2244  | 255  | 439   |
| Negative10      | 516                                 | 494   | 1817     | 1417  | 1422   | 1471  | 904  | 1863  | 2008 | 2536  | 1573 | 1468  | 708  | 963   |
| <b>Neg Mean</b> | 746                                 | 665   | 1242     | 1524  | 1221   | 2198  | 1288 | 1855  | 1942 | 1986  | 1848 | 1643  | 612  | 870   |
| <b>Neg SD</b>   | 272                                 | 124   | 525      | 832   | 312    | 880   | 605  | 1077  | 570  | 768   | 615  | 503   | 282  | 268   |
| Positive1       | 786                                 | 593   | 1078     | 1731  | 1112   | 1271  | 1019 | 426   | 1666 | 2331  | 1007 | 1161  | 619  | 680   |
| Positive2       | 817                                 | 679   | 921      | 931   | 1754   | 1732  | 517  | 1907  | 869  | 1226  | 1700 | 1012  | 821  | 552   |
| Positive3       | 467                                 | 368   | 1618     | 1582  | 2213   | 2336  | 1983 | 1190  | 2291 | 1321  | 1355 | 1110  | 503  | 1022  |
| Positive4       | 887                                 | 872   | 961      | 2063  | 1230   | 1390  | 2850 | 2264  | 1116 | 772   | 1284 | 1651  | 413  | 1124  |
| Positive5       | 828                                 | 769   | 1664     | 1654  | 3044   | 1437  | 2311 | 2650  | 2236 | 3505  | 690  | 1215  | 450  | 753   |
| Positive6       | 677                                 | 680   | 961      | 1314  | 974    | 2843  | 819  | 1410  | 1414 | 1934  | 714  | 953   | 451  | 877   |
| Positive7       | 620                                 | 522   | 325      | 1630  | 635    | 1446  | 1620 | 671   | 803  | 924   | 1227 | 1650  | 267  | 259   |
| Positive8       | 443                                 | 530   | 817      | 645   | 733    | 1526  | 1574 | 1284  | 3001 | 852   | 1017 | 2401  | 571  | 811   |
| Positive9       | 709                                 | 415   | 1146     | 1107  | 2481   | 1119  | 2090 | 1317  | 1991 | 1990  | 1059 | 1343  | 430  | 847   |
| Positive10      | 515                                 | 519   | 2152     | 1251  | 845    | 2100  | 797  | 2948  | 1349 | 3276  | 1730 | 3152  | 466  | 1046  |
| <b>Pos Mean</b> | 675                                 | 595   | 1164     | 1391  | 1502   | 1720  | 1558 | 1607  | 1674 | 1813  | 1178 | 1565  | 499  | 797   |
| <b>Pos SD</b>   | 159                                 | 157   | 517      | 422   | 829    | 543   | 760  | 822   | 703  | 983   | 357  | 704   | 147  | 257   |

**Supplementary Table 1. Vertices in each region of interest across subjects.**

### Final trial counts used in mixed models regression analyses

| region   | left hemisphere | right hemisphere |
|----------|-----------------|------------------|
| ERC      | 2,528           | 2,467            |
| Fusiform | 3,146           | 3,448            |
| Insula   | 2,643           | 2,917            |
| IPL      | 2,768           | 3,224            |
| LOC      | 4,062           | 4,637            |
| V1       | 4,582           | 5,011            |
| OFC      | 2,904           | 2,941            |

**Supplementary Table 2. Final number of trials ultimately analyzed for mixed models regression analyses.** We presented each subject with 500 trials (10,000 trials total). 7,331 trials remained after removing incorrect trials and trials with oculomotor and muscle artifacts. This population of trials was used for computing mean evoked responses for each subject, and for functional connectivity analyses. For our analysis of trial-by-trial responses using mixed models regression, we also excluded trials on which we could not detect the onset of an evoked response, yielding the values listed above.

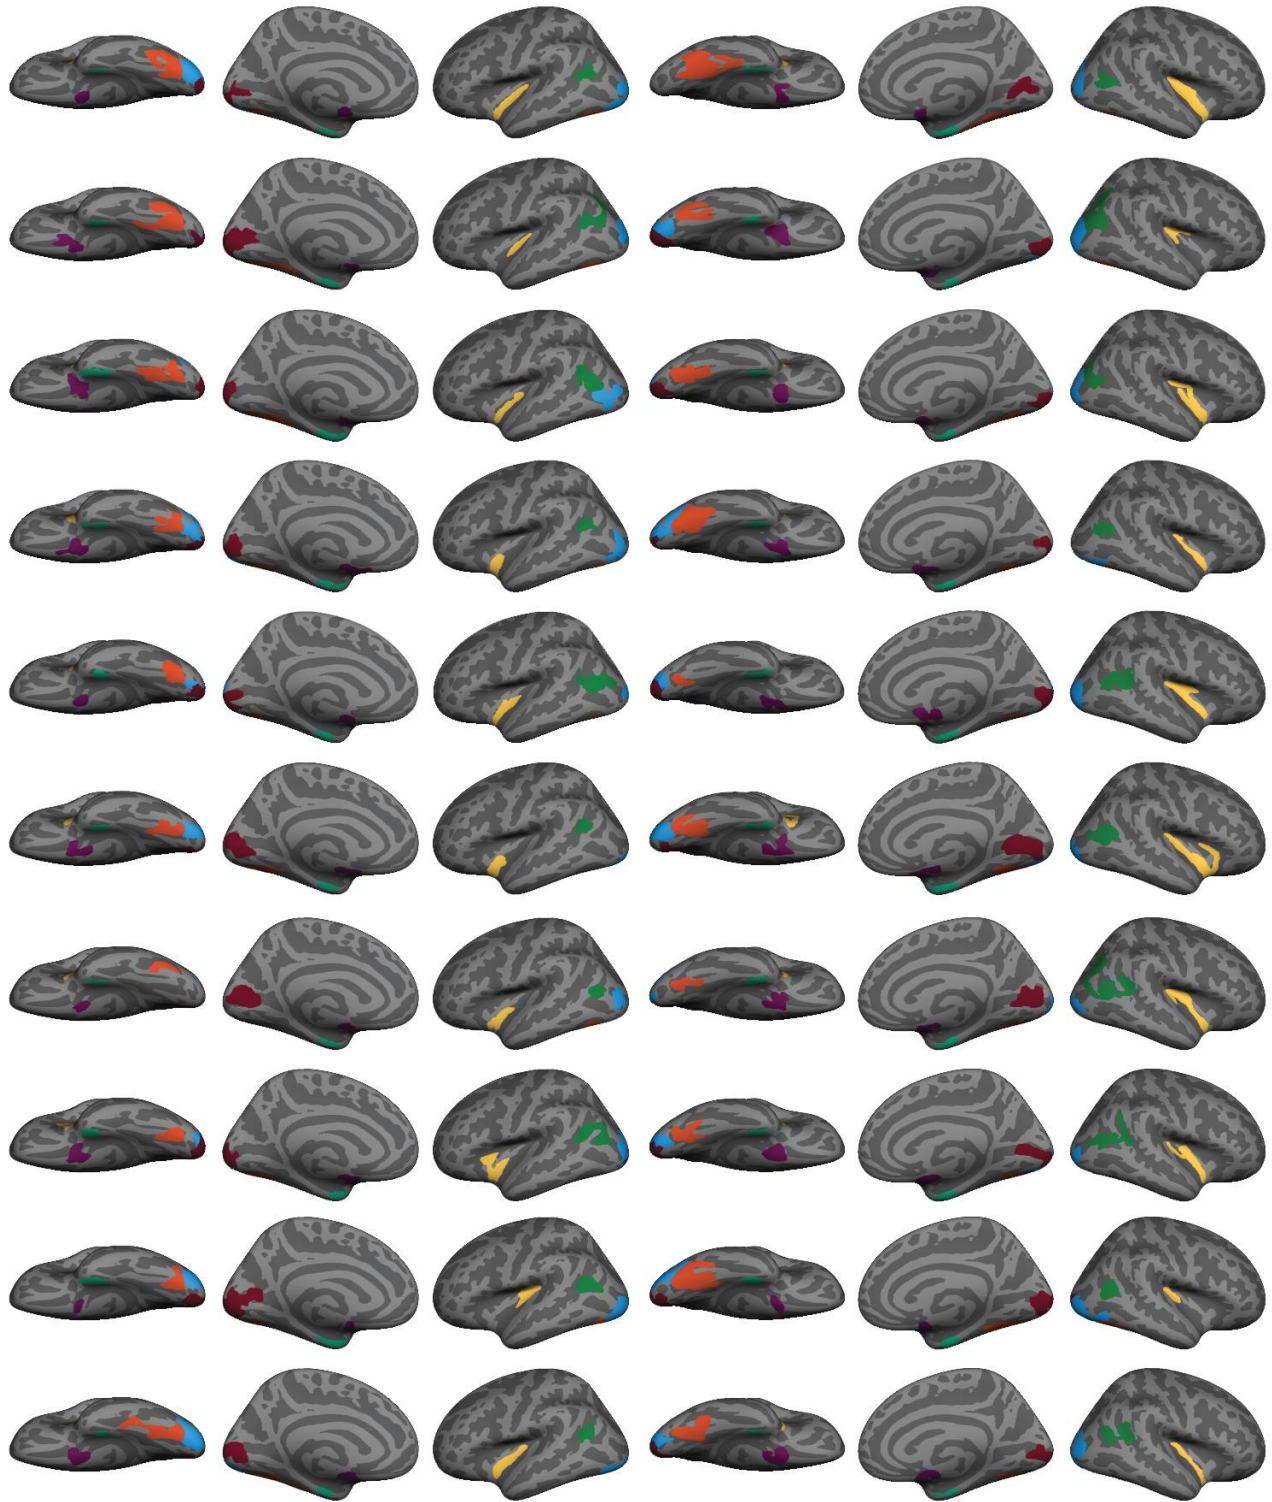

**Supplementary Figure 1. Subject-specific ROIs (negative affect group subjects).** Each row shows the functionally-defined ROIs for one subject. Maroon = V1, blue = lateral occipital complex, orange = fusiform gyrus, teal = entorhinal cortex, yellow = Insula, green = inferior parietal lobule, purple = OFC.

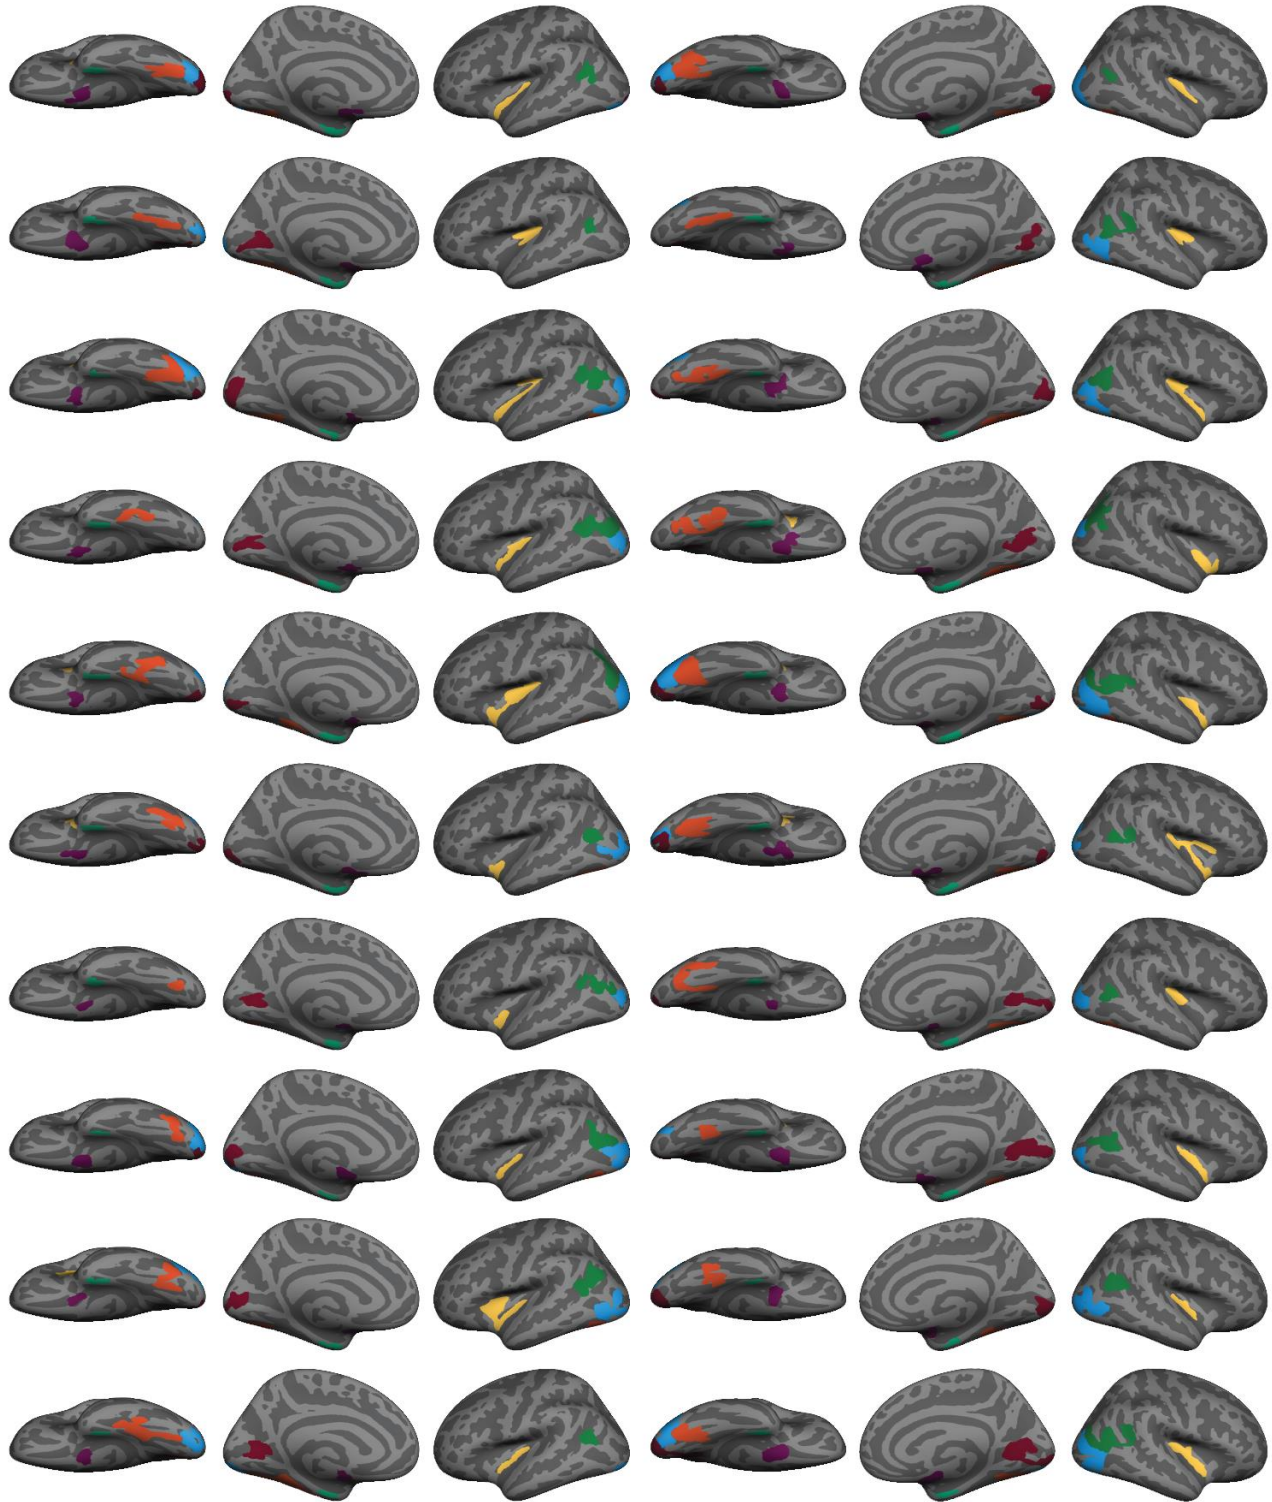

**Supplementary Figure 2. Subject-specific ROIs (positive affect group subjects).** Each row shows the functionally-defined ROIs for one subject. Maroon = V1, blue = lateral occipital complex, orange = fusiform gyrus, teal = entorhinal cortex, yellow = Insula, green = inferior parietal lobule, purple = OFC.

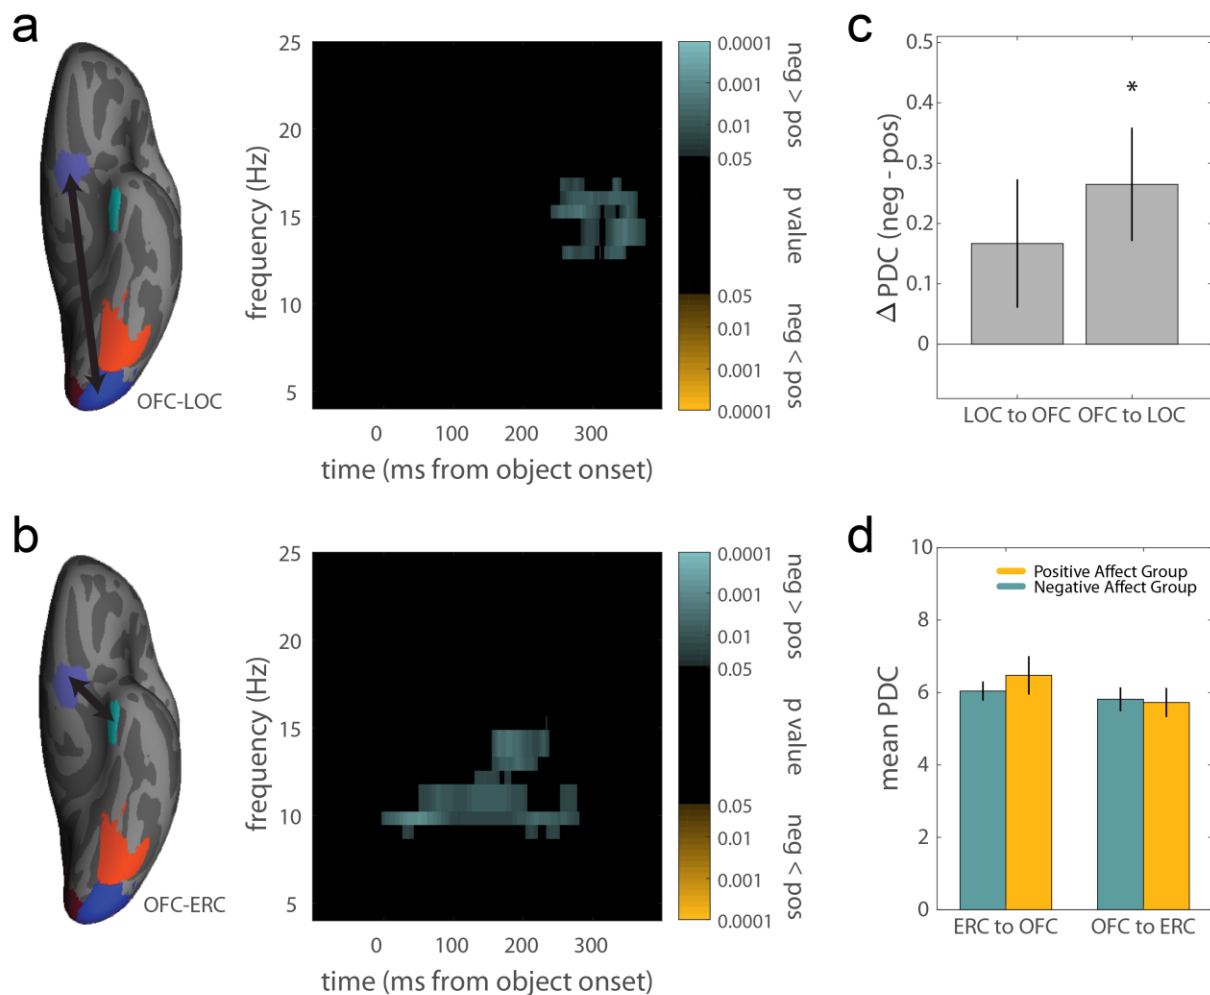

**Supplementary Figure 3. OFC functional connectivity varies with valence.** a) Within subjects, on trials during which individuals report more negative valence, we observe a late  $\beta$ -band increase in synchrony between left OFC and LOC ( $p = 0.059$  cluster-corrected). b) Between affect groups, we observe greater  $\alpha$ - and low  $\beta$ -band phase-locking between left OFC and ERC ( $p = 0.049$ ). c) Difference in partial directed coherence between OFC and LOC on negative relative to positive trials (median split). d) Partial directed coherence between OFC and ERC for the negative and positive affect groups.
